# Supplementary material for: A Seismic Fragility Assessment Method for Urban Function Spatial Units: A Case Study of Xuzhou City
Source: MDPI journal article supplement (doi:10.3390/su15108022), 2023-05-15
Supplement: s1 [file s1]

## Supplementary Materials

**Table S1.** Fragility parameters for function of spatial unit.

| ID | $\mu(S)$ | $\mu(M)$ | $\mu(E)$ | $\mu(C)$ | $\beta(S)$ | $\beta(M)$ | $\beta(E)$ | $\beta(C)$ |
|----|----------|----------|----------|----------|------------|------------|------------|------------|
| 1  | 0.09     | 0.19     | 0.53     | 1.18     | 0.63       | 0.62       | 0.64       | 0.66       |
| 2  | 0.09     | 0.19     | 0.52     | 1.18     | 0.64       | 0.64       | 0.61       | 0.67       |
| 3  | 0.08     | 0.15     | 0.4      | 0.87     | 0.64       | 0.66       | 0.66       | 0.65       |
| 4  | 0.08     | 0.15     | 0.41     | 0.91     | 0.65       | 0.64       | 0.65       | 0.63       |
| 5  | 0.07     | 0.14     | 0.38     | 0.89     | 0.64       | 0.61       | 0.63       | 0.67       |
| 6  | 0.1      | 0.2      | 0.55     | 1.3      | 0.62       | 0.64       | 0.61       | 0.64       |
| 7  | 0.1      | 0.2      | 0.54     | 1.27     | 0.67       | 0.65       | 0.64       | 0.65       |
| 8  | 0.11     | 0.22     | 0.6      | 1.34     | 0.62       | 0.63       | 0.67       | 0.64       |
| 9  | 0.09     | 0.18     | 0.5      | 1.15     | 0.64       | 0.64       | 0.63       | 0.66       |
| 10 | 0.08     | 0.17     | 0.46     | 1.01     | 1.27       | 1.59       | 1.73       | 1.91       |
| 11 | 0.1      | 0.2      | 0.54     | 1.23     | 0.61       | 0.64       | 0.66       | 0.62       |
| 12 | 0.11     | 0.21     | 0.57     | 1.31     | 0.65       | 0.64       | 0.64       | 0.67       |
| 13 | 0.11     | 0.22     | 0.61     | 1.35     | 0.63       | 0.61       | 0.63       | 0.65       |
| 14 | 0.1      | 0.2      | 0.53     | 1.21     | 0.61       | 0.63       | 0.64       | 0.63       |
| 15 | 0.1      | 0.21     | 0.55     | 1.31     | 0.62       | 0.63       | 0.66       | 0.66       |
| 16 | 0.1      | 0.21     | 0.58     | 1.31     | 0.61       | 0.64       | 0.66       | 0.63       |
| 17 | 0.1      | 0.21     | 0.56     | 1.26     | 0.63       | 0.63       | 0.64       | 0.63       |
| 18 | 0.08     | 0.15     | 0.4      | 0.91     | 0.6        | 0.63       | 0.65       | 0.66       |
| 19 | 0.11     | 0.22     | 0.54     | 1.28     | 0.61       | 0.65       | 0.66       | 0.66       |
| 20 | 0.08     | 0.16     | 0.43     | 1.01     | 1.25       | 1.26       | 1.32       | 1.38       |
| 21 | 0.11     | 0.21     | 0.57     | 1.32     | 0.62       | 0.63       | 0.62       | 0.61       |
| 22 | 0.08     | 0.17     | 0.45     | 1.08     | 0.66       | 0.64       | 0.63       | 0.66       |
| 23 | 0.12     | 0.23     | 0.63     | 1.46     | 0.66       | 0.62       | 0.64       | 0.64       |
| 24 | 0.08     | 0.16     | 0.43     | 0.97     | 0.99       | 1.09       | 1.33       | 1.48       |
| 25 | 0.09     | 0.19     | 0.52     | 1.15     | 0.62       | 0.65       | 0.66       | 0.64       |
| 26 | 0.11     | 0.22     | 0.62     | 1.39     | 0.63       | 0.65       | 0.66       | 0.67       |
| 27 | 0.1      | 0.21     | 0.58     | 1.3      | 0.65       | 0.64       | 0.66       | 0.64       |
| 28 | 0.11     | 0.22     | 0.6      | 1.34     | 0.65       | 0.64       | 0.63       | 0.63       |
| 29 | 0.12     | 0.23     | 0.65     | 1.51     | 0.62       | 0.64       | 0.63       | 0.62       |
| 30 | 0.06     | 0.11     | 0.29     | 0.65     | 0.77       | 0.82       | 0.87       | 0.94       |
| 31 | 0.08     | 0.18     | 0.49     | 1.1      | 0.63       | 0.65       | 0.65       | 0.61       |
| 32 | 0.08     | 0.18     | 0.49     | 1.1      | 0.63       | 0.63       | 0.62       | 0.63       |
| 35 | 0.06     | 0.12     | 0.32     | 0.77     | 0.63       | 0.66       | 0.64       | 0.64       |
| 36 | 0.09     | 0.2      | 0.55     | 1.21     | 0.63       | 0.63       | 0.65       | 0.65       |
| 37 | 0.1      | 0.21     | 0.58     | 1.34     | 0.63       | 0.67       | 0.63       | 0.64       |
| 38 | 0.16     | 0.3      | 0.74     | 1.69     | 0.62       | 0.67       | 0.63       | 0.67       |
| 39 | 0.1      | 0.2      | 0.55     | 1.25     | 0.65       | 0.63       | 0.65       | 0.63       |
| 40 | 0.18     | 0.31     | 0.63     | 1.29     | 0.63       | 0.63       | 0.66       | 0.64       |
| 41 | 0.1      | 0.2      | 0.56     | 1.23     | 0.66       | 0.62       | 0.65       | 0.64       |
| 42 | 0.1      | 0.2      | 0.54     | 1.21     | 0.65       | 0.64       | 0.64       | 0.62       |
| 43 | 0.07     | 0.15     | 0.4      | 0.96     | 1.22       | 1.25       | 1.53       | 1.67       |
| 44 | 0.07     | 0.15     | 0.41     | 0.94     | 1.21       | 1.28       | 1.49       | 1.67       |
| 45 | 0.06     | 0.11     | 0.25     | 0.49     | 0.7        | 0.66       | 0.66       | 0.63       |
| 46 | 0.1      | 0.21     | 0.59     | 1.33     | 0.65       | 0.62       | 0.64       | 0.63       |
| 48 | 0.11     | 0.22     | 0.6      | 1.34     | 0.63       | 0.64       | 0.66       | 0.64       |
| 49 | 0.11     | 0.22     | 0.62     | 1.35     | 0.66       | 0.63       | 0.66       | 0.64       |

| ID | $\mu(S)$ | $\mu(M)$ | $\mu(E)$ | $\mu(C)$ | $\beta(S)$ | $\beta(M)$ | $\beta(E)$ | $\beta(C)$ |
|----|----------|----------|----------|----------|------------|------------|------------|------------|
| 50 | 0.1      | 0.21     | 0.59     | 1.3      | 0.64       | 0.62       | 0.66       | 0.65       |
| 51 | 0.09     | 0.19     | 0.53     | 1.19     | 0.64       | 0.63       | 0.64       | 0.63       |
| 52 | 0.09     | 0.18     | 0.48     | 1.07     | 0.66       | 0.63       | 0.63       | 0.63       |
| 53 | 0.08     | 0.17     | 0.44     | 1.04     | 0.63       | 0.65       | 0.63       | 0.64       |
| 54 | 0.09     | 0.18     | 0.48     | 1.09     | 0.62       | 0.64       | 0.67       | 0.65       |
| 55 | 0.1      | 0.2      | 0.55     | 1.24     | 0.65       | 0.6        | 0.62       | 0.65       |
| 56 | 0.09     | 0.19     | 0.49     | 1.14     | 0.65       | 0.64       | 0.63       | 0.63       |
| 57 | 0.1      | 0.2      | 0.54     | 1.26     | 0.63       | 0.64       | 0.63       | 0.64       |
| 58 | 0.1      | 0.21     | 0.57     | 1.29     | 0.63       | 0.65       | 0.64       | 0.65       |
| 60 | 0.11     | 0.21     | 0.58     | 1.33     | 0.64       | 0.64       | 0.63       | 0.65       |
| 61 | 0.09     | 0.18     | 0.5      | 1.15     | 0.63       | 0.66       | 0.65       | 0.62       |
| 62 | 0.11     | 0.21     | 0.57     | 1.31     | 0.69       | 0.63       | 0.63       | 0.65       |
| 63 | 0.09     | 0.17     | 0.47     | 1.07     | 1.32       | 1.61       | 1.58       | 1.82       |
| 64 | 0.1      | 0.19     | 0.52     | 1.21     | 0.62       | 0.64       | 0.62       | 0.66       |
| 65 | 0.1      | 0.18     | 0.5      | 1.15     | 0.67       | 0.64       | 0.64       | 0.64       |
| 66 | 0.07     | 0.15     | 0.39     | 0.92     | 0.64       | 0.64       | 0.64       | 0.65       |
| 67 | 0.09     | 0.19     | 0.5      | 1.16     | 0.64       | 0.66       | 0.64       | 0.64       |
| 68 | 0.08     | 0.17     | 0.45     | 1.06     | 0.63       | 0.62       | 0.61       | 0.64       |
| 69 | 0.11     | 0.23     | 0.62     | 1.44     | 0.67       | 0.63       | 0.63       | 0.65       |
| 70 | 0.09     | 0.19     | 0.53     | 1.2      | 0.64       | 0.61       | 0.67       | 0.62       |
| 71 | 0.1      | 0.2      | 0.55     | 1.25     | 0.63       | 0.65       | 0.65       | 0.63       |
| 72 | 0.11     | 0.22     | 0.6      | 1.35     | 0.65       | 0.66       | 0.64       | 0.65       |
| 73 | 0.1      | 0.22     | 0.58     | 1.34     | 0.66       | 0.62       | 0.64       | 0.63       |
| 74 | 0.1      | 0.2      | 0.54     | 1.25     | 0.62       | 0.63       | 0.64       | 0.61       |
| 78 | 0.11     | 0.23     | 0.63     | 1.49     | 0.64       | 0.64       | 0.63       | 0.64       |
| 79 | 0.11     | 0.23     | 0.63     | 1.42     | 0.65       | 0.64       | 0.64       | 0.63       |
| 80 | 0.1      | 0.2      | 0.55     | 1.26     | 0.65       | 0.65       | 0.65       | 0.64       |
| 81 | 0.11     | 0.23     | 0.63     | 1.42     | 0.63       | 0.64       | 0.66       | 0.63       |
| 82 | 0.08     | 0.18     | 0.47     | 1.06     | 1.27       | 1.59       | 1.76       | 1.96       |
| 83 | 0.1      | 0.2      | 0.56     | 1.26     | 0.64       | 0.65       | 0.65       | 0.65       |
| 84 | 0.09     | 0.19     | 0.52     | 1.16     | 0.64       | 0.63       | 0.65       | 0.64       |
| 85 | 0.05     | 0.11     | 0.29     | 0.63     | 0.77       | 0.93       | 1.07       | 1.14       |
| 86 | 0.09     | 0.18     | 0.49     | 1.1      | 0.63       | 0.63       | 0.65       | 0.64       |
| 87 | 0.05     | 0.08     | 0.18     | 0.35     | 0.65       | 0.64       | 0.66       | 0.74       |
| 88 | 0.05     | 0.09     | 0.17     | 0.33     | 0.71       | 0.68       | 0.65       | 0.64       |
| 89 | 0.1      | 0.22     | 0.61     | 1.39     | 0.65       | 0.63       | 0.66       | 0.64       |
| 90 | 0.09     | 0.17     | 0.44     | 1.01     | 1.27       | 1.57       | 1.7        | 1.74       |
| 91 | 0.07     | 0.14     | 0.37     | 0.83     | 1.23       | 1.56       | 1.48       | 1.72       |
| 92 | 0.06     | 0.12     | 0.32     | 0.72     | 0.77       | 0.9        | 0.93       | 1.02       |
| 93 | 0.08     | 0.17     | 0.47     | 1.04     | 1.26       | 1.59       | 1.55       | 1.61       |
| 94 | 0.06     | 0.1      | 0.25     | 0.54     | 0.69       | 0.79       | 0.9        | 1.03       |
| 95 | 0.1      | 0.19     | 0.52     | 1.15     | 1.31       | 1.61       | 1.78       | 1.95       |
| 96 | 0.09     | 0.18     | 0.51     | 1.11     | 1.33       | 1.63       | 1.8        | 1.96       |
| 97 | 0.08     | 0.13     | 0.25     | 0.41     | 0.64       | 0.65       | 0.64       | 0.66       |
